# Supplementary material for: Porous recyclable sponges with controllable and durable shape memory
Source: Royal Society of Chemistry journal article supplement (doi:10.1039/d2ma00953f), 2023-01-01
Supplement: d2ma00953f1.pdf [file d2ma00953f1.pdf]

### Porous Recyclable Sponges with Controllable and Durable Shape Memory

Jinfeng Cao, Cong Gui, Shengyu Feng\*

Key Laboratory of Special Functional Aggregated Materials & Key Laboratory of Colloid and Interface Chemistry (Shandong University), Ministry of Education; Shandong Key Laboratory of Advanced Silicone Materials and Technology; School of Chemistry and Chemical Engineering, Shandong University, Jinan 250199, P. R. China

[fsy@sdu.edu.cn](mailto:fsy@sdu.edu.cn)

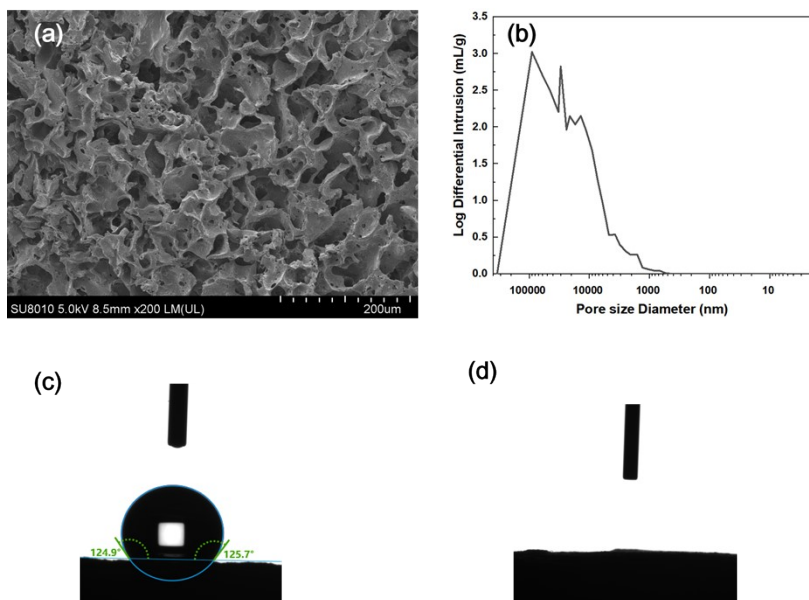

**Figure S1** (a) SEM image, and (b) Pore size distribution obtained by mercury porosimetry of the SS-COOH after the compression process. The contact angle of (c) water and (d) organic solvents including dichloromethane, kerosene, toluene, ethanol, acetone, and cyclohexane on the SS-COOH.

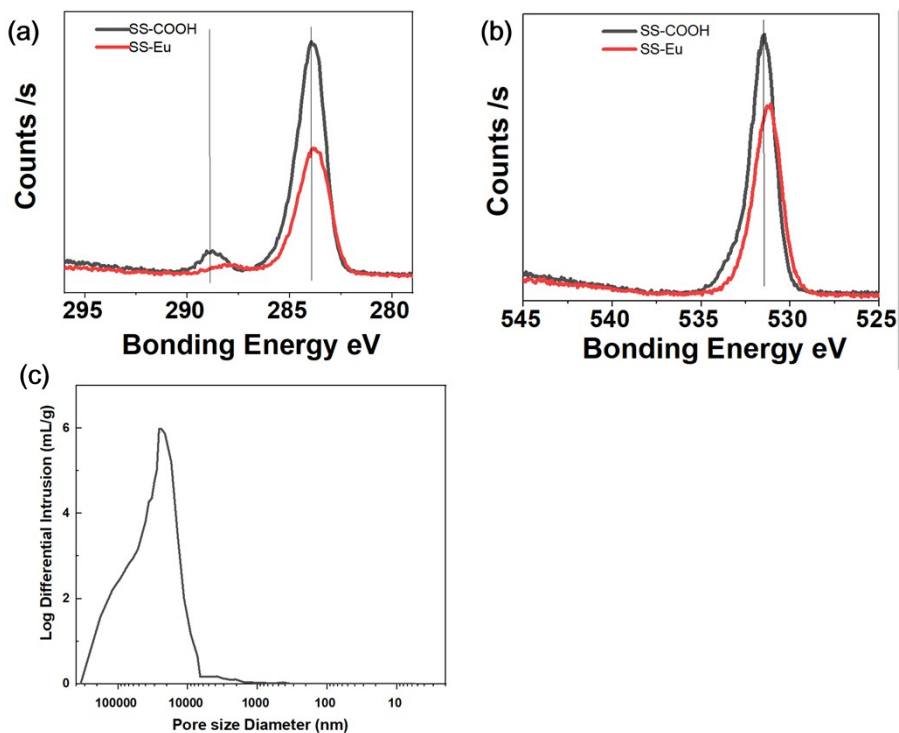

**Figure S2** (a) XPS of the C 1s spectral region of SS-COOH and SS-Eu; (b) XPS of the O 1s spectral region of SS-COOH and SS-Eu; (c) Mercury porosimetry pore size distribution of SS-COOH.

and SS-Eu. (c) Pore size distribution obtained by mercury porosimetry of the SS-Eu.

**Table S1** Elemental analysis of the sponge SS-COOH and SS-Eu.

| SS-COOH | C %   | H %   | N %  | S %   |
|---------|-------|-------|------|-------|
| found   | 38.43 | 7.583 | 0    | 6.237 |
| SS-Eu   | C %   | H %   | N %  | S %   |
| found   | 35.54 | 7.037 | 0.59 | 5.815 |
